# Supplementary material
Source: HighWire-hosted journal article supplement (https://www.qdcxjkg.com/highwire/filestream/113561/field_highwire_adjunct_files/1/14_Meldebogen.pdf)
Supplement: 14_Meldebogen.pdf [file 14_Meldebogen.pdf]

Reference no. 14 of

Winkelmann A, Noack T: The Clara cell – a 'Third Reich eponym'? *Eur Respir J* 2010;29; 36: 722–727

Clara M: Meldebogen auf Grund des Gesetzes zur Befreiung von Nationalsozialismus und Militarismus [Questionnaire based on the Law for Liberation from National Socialism and Militarism]. 1946. *Archive*: Staatsarchiv, München. *Signature*: Spruchkammerakt Dr. Max Clara, Spruchkammern Kt. 244.

### **Short comment by the authors:**

After the war, every German citizen had to complete this double-sided questionnaire (*Meldebogen*), which was part of the process of denazification. Clara completed this questionnaire shortly after being released from a US internment camp in October 1946.

Under Point 1., Clara confirms his NSDAP membership and, under Point 1m, his activities in the "*NS.-Dozentenbund*", the National Socialist League of Lecturers. He was "*örtlicher Dozentenführer*" (local leader of lecturers) from 1939 to 1942 and "*kommisarischer Gaudozentenführer*" (acting district leader of lecturers) from autumn 1941 to summer 1942.

The second page reveals under Point 8 that Clara's annual income in Munich in 1943 was nearly double his income in Leipzig in 1938. Under Point 14., Clara claims that he was "deposed from office due to active resistance" (*Infolge aktiven Widerstands von Ämtern abgesetzt*).

3148/R31 München 30.10.46 C  
 Lfd. Nr. Einlieferungsart Einlieferungstag Buchstabe

**Meldebogen** auf Grund des Gesetzes zur Befreiung von Nationalsozialismus und Militarismus vom 5. März 1946.

Deutlich und lesbar ausfüllen (Druckbuchstaben)! Dickumrahmtes nicht ausfüllen! Jede Frage ist zu beantworten!

Zuname **DR. CLARA** Vornamen **MAX JOSEF MARIA** Beruf **UNIV.-PROFESSOR UND ARZT**  
 Wohnort **MÜNCHEN-PASING** Straße **REMBRANDTSTR. 13**  
 Geburtsdatum **12.2.1899** Geburtsort **Völs a/Schlieren (Südtirol)** Familienstand ledig/verheiratet/verwitwet/geschieden  
 Wohnorte seit 1933:  
 a) **BLUMAU BEI BOZEN (SÜDTIROL)** von **1933** bis **1935**  
 b) **LEIPZIG** von **1935** bis **1942**  
 c) **MÜNCHEN** von **1942** bis **HEUTE**

| 1. | Waren Sie jemals Angehöriger, Anwärter, Mitglied, förderndes Mitglied der: | Ja oder Nein | Höchster Mitgliedsbeitrag monatlich RM | von bis |      | Mitglieds-Nr. | höchster Rang od. höchstes bekleidetes Amt od. Tätigkeit, auch vertretungsweise od. ehrenhalber |     |     | Klasse oder Teil: R |
|----|----------------------------------------------------------------------------|--------------|----------------------------------------|---------|------|---------------|-------------------------------------------------------------------------------------------------|-----|-----|---------------------|
|    |                                                                            |              |                                        | von     | bis  |               | Bezeichnung                                                                                     | von | bis |                     |
| a  | NSDAP.                                                                     | JA           | 8.-                                    | 1935    | 1945 | ?             | KEINE                                                                                           |     |     |                     |
| b  | Allg. SS                                                                   | NEIN         |                                        |         |      |               |                                                                                                 |     |     |                     |
| c  | Waffen-SS                                                                  | NEIN         |                                        |         |      |               |                                                                                                 |     |     |                     |
| d  | Gestapo                                                                    | NEIN         |                                        |         |      |               |                                                                                                 |     |     |                     |
| e  | SD (Sicherheitsdienst) oder SS                                             | NEIN         |                                        |         |      |               |                                                                                                 |     |     |                     |
| f  | Geheime Feldpolizei                                                        | NEIN         |                                        |         |      |               |                                                                                                 |     |     |                     |
| g  | SA.                                                                        | NEIN         |                                        |         |      |               |                                                                                                 |     |     |                     |
| h  | NSKK. (NS-Kraftfahr-Korps)                                                 | NEIN         |                                        |         |      |               |                                                                                                 |     |     |                     |
| i  | NSFK. (NS-Flieger-Korps)                                                   | NEIN         |                                        |         |      |               |                                                                                                 |     |     |                     |
| k  | NSF. (NS-Frauensschaft)                                                    | NEIN         |                                        |         |      |               |                                                                                                 |     |     |                     |
| l  | NSDStB. (NS-Studentenbund)                                                 | NEIN         |                                        |         |      |               |                                                                                                 |     |     |                     |
| m  | NSDoB. (NS-Dozentenbund)                                                   | JA           | 4.-                                    | 1935    | 1945 | ?             | KOMMISSAR-GAU-DOZENTENFÜHR. HERBST 1941 SOMMER 1942<br>ORTS-DOZENTENFÜHR. 1936 1942             |     |     |                     |
| n  | HJ.                                                                        | NEIN         |                                        |         |      |               |                                                                                                 |     |     |                     |
| o  | BdM.                                                                       | NEIN         |                                        |         |      |               |                                                                                                 |     |     |                     |

2. Gehörten Sie außer Ziffer 1. einer Naziorganisation gemäß Anhang zum Gesetz an?\*

|   | Bezeichnung  | von bis |      | höchster Rang oder höchstes bekleidetes Amt od. Tätigkeit, auch vertretungsweise od. ehrenl. |     |     |
|---|--------------|---------|------|----------------------------------------------------------------------------------------------|-----|-----|
|   |              | von     | bis  | Bezeichnung                                                                                  | von | bis |
| a | NSV          | 1935    | 1945 | KEINE                                                                                        |     |     |
| b | NS-ARZTEBUND | 1935    | 1945 | KEINE                                                                                        |     |     |
| c |              |         |      |                                                                                              |     |     |
| d |              |         |      |                                                                                              |     |     |
| e |              |         |      |                                                                                              |     |     |
| f |              |         |      |                                                                                              |     |     |
| g |              |         |      |                                                                                              |     |     |

\* Es ist jedem freigestellt, hier auch die Zugehörigkeit zu anderen Organisationen nachzuweisen.

3. Waren Sie Träger von Parteauszeichnungen (Parteiorden), Empfänger von Ehrensold oder sonstiger Parteibegünstigungen? **NEIN**  
 Welcher? \_\_\_\_\_
4. Hatten Sie irgendwann Vorteile durch Ihre Mitgliedschaft bei einer Naziorganisation (z. B. durch Zuschüsse, Sonderzuteilungen der Wirtschaftsgruppe, Beförderungen, UK-Stellung u. ä.)? **NEIN**  
 Welche? \_\_\_\_\_
5. Machten Sie jemals finanzielle Zuwendungen an die NSDAP. oder eine sonstige Naziorg.? **NEIN**  
 an welche \_\_\_\_\_ in welchen Jahren: \_\_\_\_\_ insgesamt RM: \_\_\_\_\_  
 (Hier abtrennen!)

**3148/R31** Lfd. Nr. **QUITTING** Bei der Lebensmittelkartenausgabe vorzuzeigen!  
 Herr Frau Frl. **PROF. DR. CLARA** **MAX** geb. am **12.2.1899**  
 wohnhaft in **PASING** **REMBRANDT** Straße **13** hat heute auf unterzeichneter  
 Dienststelle seinen Meldebogen abgegeben.  
**PASING** Datum \_\_\_\_\_  
 Ort \_\_\_\_\_ Datum \_\_\_\_\_  
 Stempel und Unterschrift der Dienststelle

Staatsarchiv München  
Spr. Ka. Karton 244

6. Zugehörigkeit zur Wehrmacht, Polizeiformationen. RAD, OT, Transportgruppe Speer u. ä.

| Genauere Bezeichnung der Formation                          |                         | höchster erreichter Rang | ab wann            |
|-------------------------------------------------------------|-------------------------|--------------------------|--------------------|
| a                                                           | K.K. GEB. ART. REG. 203 | Lt. D.R.                 | 1918               |
| b                                                           | KEINE                   | ASS.-ARZT D.R. Z.V.      | 1939               |
| c Waren Sie NS.-Führungsoffizier auch wenn nicht bestätigt? |                         | NEIN                     | von — bis —        |
| d Waren Sie Generalstabsoffizier?                           |                         | NEIN                     | Rang — von — bis — |

Klasse oder Teil B

7. In welchen Organisationen (Wirtschaft, Wohlfahrt) bekleideten Sie ein Haupt-, Neben- oder Ehrenamt?

| Bezeichnung | von         |     | bis |             | höchster Rang o. höchstes bekleidetes Amt o. Tätigkeit, auch vertretungsw. o. ehrenh. |
|-------------|-------------|-----|-----|-------------|---------------------------------------------------------------------------------------|
|             | Bezeichnung | von | bis | Bezeichnung |                                                                                       |
| a           | KEINE       |     |     |             |                                                                                       |
| b           |             |     |     |             |                                                                                       |
| c           |             |     |     |             |                                                                                       |
| d           |             |     |     |             |                                                                                       |
| e           |             |     |     |             |                                                                                       |
| f           |             |     |     |             |                                                                                       |

8. Angaben über Ihre Haupttätigkeit, Einkommen und Vermögen seit 1932

| Jahr   | Waren Sie selbstständig o. Arbeitnehmer | Falls selbstständig, Zahl der Beschäftigten | Stellung o. Dienstbezeichnung als Arbeiter, Handwerker, Angestellter, Beamter, Vorstand, Gesellschafter, Aufsichtsrat, Unternehmer, freier Beruf etc. | Firma des Arbeitgebers oder eigene Firma bzw. Berufsbez. mit Anschrift | Steuerpflicht. Ges.-Einkom. d. Betroffenen | Steuerpflicht. Vermögen d. Betroffenen |
|--------|-----------------------------------------|---------------------------------------------|-------------------------------------------------------------------------------------------------------------------------------------------------------|------------------------------------------------------------------------|--------------------------------------------|----------------------------------------|
|        |                                         |                                             |                                                                                                                                                       |                                                                        | R.M.                                       | R.M.                                   |
| a 1932 | SELBSTSTÄNDIG                           | KEINE                                       | ARZT UND DOZENT                                                                                                                                       | ARZT BLUMAU B. BOZEN                                                   | 80.000                                     | KEINES                                 |
| b 1934 |                                         |                                             |                                                                                                                                                       |                                                                        | 23.000                                     | KEINES                                 |
| c 1938 | ARBEITNEHMER                            | —                                           | ORD. UNIV. PROFESSOR                                                                                                                                  | UNIV. GELTZIG                                                          | 40.000                                     | KEINES                                 |
| d 1943 |                                         |                                             |                                                                                                                                                       |                                                                        | 19.000                                     | KEINES                                 |
| e 1945 |                                         |                                             |                                                                                                                                                       |                                                                        | —                                          | —                                      |

9. Haben Sie Unternehmen oder Betriebe betreut oder kontrolliert? NEIN

Welche? —

10. Wurden Ihnen von Staat, Partei, Wirtschaft o. ä. Organisationen bisher nicht angeführte Titel, Dienststränge oder -bezeichnungen verliehen? NEIN

Welche? —

11. Läuft oder lief für Sie bereits ein Prüfungsverfahren? NEIN Akt-Zeich.? —  
Wo? — Mit welchem Ergebnis? —

12. Ist Ihre Beschäftigung von der Militärregierung schriftlich genehmigt? ENTFALLT  
Vorläufig? — Endgültig? — Ist Ihre Beschäftigung von der Militärregierung abgelehnt? —  
Durch welche örtliche Militärregierung und wann wurde Ihre Beschäftigung genehmigt oder abgelehnt? —

Ich versichere die Richtigkeit und Vollständigkeit der von mir gemachten Angaben. Falsche oder irreführende oder unvollständige Angaben werden gemäß Art. 65 des Gesetzes zur Befreiung von Nationalsozialismus und Militarismus mit Gefängnis oder mit Geldstrafe bestraft.

13. In welche Gruppe des Gesetzes gliedern Sie sich ein? GRUPPE 5

Falls Sie glauben, daß das Gesetz nicht auf Sie Anwendung findet, geben Sie Gründe an:

(INFOLGE AKTIVEN WIDERSTANDES VON AMERIKANERN ABGESETZT UND VOM GAUPARTIEGERICHT WEGEN PARTEISCHÄDIGEN DEN VERHALTENS VERURTEILT UND BESTRAFT. INFOLGE DIESES TATBESTANDES VON DEN AMERIKANERN (MILITÄRREGIERUNG) AUS DEM INTERNIERUNGSLAGER ENTLASSEN.

14. Bemerkungen:

MÜNCHEN-PASING, 21.10.1946

Unterschrift: *H. Claus*  
Name Vorname
